# Supplementary material for: Spatial–temporal order–disorder transition in angiogenic NOTCH signaling controls cell fate specification
Source: eLife. 2024 Feb 20;12:RP89262. doi: 10.7554/eLife.89262 (PMC10942579; doi:10.7554/eLife.89262)
Supplement: Figure 3—source data 1. [file elife-89262-fig3-data1.xlsx]

## Sheet: VEGF 100
MS ID	LS ID	surrounding MS ID	surrounding LS ID	# of cells between
SPS10		SPC22		0
			SPC20	1		MS: mini-sprout
SPC22		SPC10		0		LS: lumenized sprout (sprout)
		SPC62		0
			SPC20	1
		SPC68		2
			SPC11	4
	SPC11	SPC41		2
		SPC68		2
		SPC5		3
		SPC12		3
		SPC67		3
		SPC22		4
SPC68		SPC62		0
		SPC65		1
		SPC22		2
		SPC67		2
			SPC11	2
	SPC20	SPC62		0
		SPC21		0
		SPC22		1
		SPC10		1
			SPC63	2
		SPC73		5
SPC62			SPC20	0
			SPC63	0
			SPC65	0
		SPC68		0
		SPC22		0
SPC67		SPC65		0
		SPC41		1
		SPC68		2
			T598	2
		SPC71		2
		SPC77		2
			SPC11	3
SPC65			SPC63	0
			T598	0
		SPC67		0
		SPC62		0
		SPC41		1
		SPC68		1
		SPC77		2
		SPC12		2
SPC41		SPC12		0
		SPC65		1
		SPC67		1
		SPC5		1
		SPC74		2
			T598	2
		SPC71		2
		SPC77		2
		SPC27		2
			SPC11	3
SPC21			SPC20	0
		P89		2
			SPC63	2
		SPC73		3
		SPC74		3
		SPC71		3
	SPC63	SPC71		0
		SPC65		0
		SPC62		0
		SPC73		1
		SPC74		1
		SPC21		2
			SPC20	2
		P89		3
	T598	SPC71		0
		SPC65		1
		SPC77		2
		SPC41		2
		SPC67		2
SPC12		SPC41		0
		SPC5		0
		SPC27		1
		SPC6		2
		SPC65		2
		SPC74		3
			SPC11	3
SPC5		SPC12		0
		SPC41		1
		SPC27		1
		SPC6		1
		SPC74		2
			SPC11	3
SPC71		SPC74		0
			T598	0
			SPC63	0
		SPC77		1
		P89		2
		SPC76		2
		SPC41		2
		SPC67		2
		SPC21		3
SPC77			SPC48	0
		SPC71		1
		SPC74		1
		SPC76		1
			SPC28	1
		SPC67		2
		SPC65		2
		SPC41		2
			T598	2
	SPC48	SPC27		0
		SPC77		0
			SPC28	1
		SPC76		2
		SPC54		3
		SPC83		4
		SPC89		4
SPC74		SPC73		0
		SPC76		0
		SPC71		0
		SPC77		1
			SPC63	1
		P89		2
		SPC5		2
		SPC41		2
		SPC89		3
		SPC54		3
			SPC28	3
		SPC12		3
		SPC21		3
SPC27			SPC48	0
			SPC28	0
		SPC6		1
		SPC5		1
		SPC12		1
		SPC41		2
SPC6		SPC5		1
		SPC27		1
		SPC1		2
		SPC12		2
		SPC54		3
			SPC28	5
P89		SPC73		0
			T606	1
		SPC31		2
		SPC74		2
		SPC21		2
		SPC71		2
		SPC49		3
		SPC79		3
		SPC76		3
			SPC63	3
SPC73			T606	0
		SPC74		0
		P89		0
		SPC79		1
		SPC76		1
			SPC63	1
		SPC83		2
		SPC21		3
		SPC84		4
			SPC20	5
SPC76		SPC74		0
		SPC54		1
		SPC77		1
		SPC73		1
		SPC83		2
		SPC89		2
			SPC28	2
		SPC71		2
			SPC48	2
		P89		3
	SPC28	SPC27		0
		SPC77		1
			SPC48	1
		SPC83		2
		SPC54		2
		SPC76		2
		SPC74		3
		SPC6		5
	T606	SPC79		0
		SPC73		0
		P89		1
		SPC31		2
		SPC49		2
		SPC83		2
SPC83		SPC89		1
		SPC79		2
		SPC49		2
			SPC52	2
		SPC84		2
		SPC54		2
		SPC73		2
		SPC76		2
			SPC28	2
			T606	2
			SPC86	3
		SPC94		3
			SPC48	4
SPC31		SPC49		2
		SPC79		2
		P89		2
			T606	2
SPC79			T606	0
		SPC49		1
			SPC52	1
		SPC73		1
			SPC86	2
		SPC83		2
		SPC31		2
		P89		3
SPC89		SPC84		1
			SPC87	1
		SPC83		1
		SPC92		2
		SPC76		2
		SPC74		3
			SPC48	4
SPC54			SPC87	0
		SPC1		1
		SPC76		1
			SPC28	2
		SPC83		2
			SPC48	3
		SPC74		3
		SPC6		3
SPC1			SPC2	1
		SPC54		1
		SPC54		2
		SPAS28		2
		SPC6		2
SPC84			SPC86	0
		SPC89		1
			T624	2
		SPC83		2
		SPC49		3
			SPC52	3
			SPC87	3
		SPC73		4
	SPC87	SPAS28		0
		SPC54		0
		SPC92		1
		SPC89		1
			SPC86	3
		SPC84		3
SPAS28		SPC92		1
			SPC98	1
			SPC2	1
		SPC58		2
		SPC35		2
		SPC8		2
