# Supplementary material for: Spatial–temporal order–disorder transition in angiogenic NOTCH signaling controls cell fate specification
Source: eLife. 2024 Feb 20;12:RP89262. doi: 10.7554/eLife.89262 (PMC10942579; doi:10.7554/eLife.89262)
Supplement: Figure 4—source data 1. [file elife-89262-fig4-data1.xlsx]

## Sheet: Sheet1
	Tip0	Tip1	Tip2	Tip3	Tip4	Tip5	Tip6	Tip7	Tip8	Tip9	Tip10	Tip11	Tip12	Tip13	Tip14	Tip15	Tip16	Tip17	Tip18	Tip19	Tip20	Tip21	Tip22	Tip23	Tip24	Tip25	Tip26	Tip27	Tip28	Tip29	Tip30	Tip31	Tip32	Tip33	Tip34	Tip35	Tip36	Tip37	Tip38	Tip39	Tip40	Tip41	Tip42	Tip43	Tip44	Tip45	Tip46	Tip47	Tip48
Frame0	Sprout	Mini-sprout	Mini-sprout	Mini-sprout	Mini-sprout	Mini-sprout	Mini-sprout	Mini-sprout	Mini-sprout	Mini-sprout	Mini-sprout	Mini-sprout	Mini-sprout	Mini-sprout	Mini-sprout	Mini-sprout	Mini-sprout	Mini-sprout	Mini-sprout	Mini-sprout	Mini-sprout	Mini-sprout	Stalk	Stalk	Stalk	Stalk	Stalk	Stalk	Stalk	Stalk	Stalk	Stalk	Stalk	Stalk	Stalk	Stalk	Stalk	Stalk	Stalk	Stalk	Stalk	Stalk	Stalk	Stalk	Stalk	Stalk	Stalk	Sprout	Sprout
Frame1	Sprout	Mini-sprout	Stalk	Stalk	Mini-sprout	Mini-sprout	Mini-sprout	Mini-sprout	Mini-sprout	Mini-sprout	Stalk	Mini-sprout	Sprout	Stalk	Sprout	Mini-sprout	Mini-sprout	Sprout	Sprout	Sprout	Mini-sprout	Stalk	Mini-sprout	Mini-sprout	Stalk	Stalk	Stalk	Stalk	Stalk	Stalk	Stalk	Stalk	Stalk	Stalk	Stalk	Stalk	Stalk	Stalk	Stalk	Stalk	Stalk	Stalk	Stalk	Stalk	Stalk	Stalk	Stalk	Sprout	Sprout
Frame2	Sprout	Mini-sprout	Stalk	Stalk	Mini-sprout	Stalk	Stalk	Mini-sprout	Stalk	Mini-sprout	Stalk	Stalk	Sprout	Stalk	Sprout	Mini-sprout	Mini-sprout	Sprout	Sprout	Sprout	Stalk	Stalk	Sprout	Mini-sprout	Mini-sprout	Mini-sprout	Mini-sprout	Mini-sprout	Mini-sprout	Mini-sprout	Mini-sprout	Mini-sprout	Mini-sprout	Mini-sprout	Mini-sprout	Mini-sprout	Stalk	Stalk	Stalk	Stalk	Stalk	Stalk	Stalk	Stalk	Stalk	Stalk	Stalk	Sprout	Sprout
Frame3	Sprout	Stalk	Stalk	Stalk	Mini-sprout	Stalk	Stalk	Mini-sprout	Mini-sprout	Mini-sprout	Stalk	Stalk	Sprout	Stalk	Sprout	Mini-sprout	Mini-sprout	Sprout	Sprout	Sprout	Stalk	Stalk	Sprout	Mini-sprout	Stalk	Stalk	Mini-sprout	Stalk	Stalk	Stalk	Sprout	Stalk	Stalk	Mini-sprout	Mini-sprout	Mini-sprout	Mini-sprout	Mini-sprout	Mini-sprout	Mini-sprout	Mini-sprout	Mini-sprout	Mini-sprout	Mini-sprout	Mini-sprout	Mini-sprout	Mini-sprout	Sprout	Sprout
[truncated: 69 more columns]
