# Supplementary material for: Spatial–temporal order–disorder transition in angiogenic NOTCH signaling controls cell fate specification
Source: eLife. 2024 Feb 20;12:RP89262. doi: 10.7554/eLife.89262 (PMC10942579; doi:10.7554/eLife.89262)
Supplement: Figure 6—source data 1. [file elife-89262-fig6-data1.xlsx]

## Sheet: Figure 6 H
Sprout(leading)	Sprout (following)	Mini-sprout	No tretment
14.5	33	35.6	24.7
12.6	83.8	5.02	15.8
41.9	46.9	36.7	55.9
44	53	36.3	8.72
28.7	49.7	11.7	48.3
11.3	67	21.7	13.1
19.7	32.6	40.4	28.2
	46.2	9.83	7.86
	30.1	28.1	31.6
	88.9	22.1	13.4
	75.2	20.5

## Sheet: Figure 6 J
x	y	z	intensity	category	group	Intensity > 30 (Ture: 1, False: 0)	Ratio of Cells
37070.8	89953.2	7.07324	11.147		1	0
37029.7	89946.5	7.48475	17.6277		1	0
37090.4	89942.3	11.0676	16.5336		1	0
37055.5	89926.6	19.9417	18.853		1	0
37091.1	89917.4	21.8812	16.3691		1	0
37038.8	89910.8	27.7676	15.1615		1	0
37015.5	89944.3	24.9163	33.0299	sprout	1	1	0.142857
38474.1	89631.7	99.6137	16.4759		2	0
38496.8	89644.2	105.231	14.6796		2	0
38441.2	89652.4	100.418	18.8418		2	0
38457.8	89646.3	108.28	19.026		2	0
38485.3	89662.3	109.895	15.1535		2	0
38510	89627.3	99.3163	13.3048		2	0
38455.1	89643.5	106.796	36.2931	mini_sprout_2	2	1	0.142857
38468.9	89681.7	109.998	18.8904		3	0
38516.4	89648.1	105.372	14.4746		3	0
38507.4	89666.5	107.686	18.9909		3	0
38521.3	89676	116.643	17.7487		3	0
38470.8	89701.6	115.141	23.0818		3	0
38523.4	89693.7	119.303	22.8297		3	0
38508.9	89718.5	122.807	36.7032	mini_sprout_1	3	1	0.142857
38425.9	89609.4	90.9594	5.91494		4	0
38406.1	89629.4	97.0048	9.53309		4	0
38392.4	89651.1	98.501	15.2195		4	0
38422.6	89670	102.717	24.2027		4	0
38434.5	89708	111.944	18.9561		4	0
38411.9	89699.5	111.744	18.8896		4	0
38398.6	89671.5	111.702	14.9624	mini_sprout_3	4	0	0
38251.2	89596.6	89.9376	18.7234		5	0
38260.5	89645.7	98.6454	28.2649		5	0
38289.3	89612.9	93.6703	28.7758		5	0
38252.6	89710.7	95.7794	28.2806		5	0
38263.9	89687.6	99.1255	29.9786		5	0
38236.4	89659.2	97.1306	25.3498		5	0
38286.5	89644	101.588	21.6664	min_sprout	5	0	0
39632.8	89741.8	121.361	25.1495		6	0
39610	89797.2	122.667	31.1771		6	1
39609.2	89706.3	125.343	28.5676		6	0
39616.1	89751.2	123.91	28.2589		6	0
39633.3	89770.9	123.319	26.8879		6	0
39595.9	89762.8	125.877	27.6836		6	0
39584.2	89786.3	133.924	40.3888	mini-sprout	6	1	0.285714
40904.2	89508.9	76.4044	14.0868		7	0
40851	89565.8	81.5618	19.5395		7	0
40871.6	89557.5	79.2266	28.4587		7	0
40889.3	89561.2	80.1345	28.2745		7	0
40925.3	89588.7	78.1258	30.3532		7	1
40923.6	89547.4	89.8199	24.4572		7	0
40945.7	89559.4	82.0267	22.1283	mini-sprout	7	0	0.142857
40683.4	89558.8	78.3611	16.1077		8	0
40718.3	89560	80.459	17.7071		8	0
40704.2	89581.3	85.9361	16.1446		8	0
40666	89603.8	88.5922	25.7288		8	0
40683.8	89618.5	89.6228	20.8416		8	0
40672.4	89586.9	90.5155	23.2653		8	0
40734.1	89610.7	90.4359	22.816	mini-sprout	8	0	0
40814.1	89580.1	78.9316	35.0257		9	1
40797.5	89585.8	82.8797	24.7522		9	0
40754.9	89583	83.3827	21.91		9	0
40805.3	89631.6	83.1856	30.145		9	1
40752.2	89633.7	87.551	33.1735		9	1
40786.7	89617.7	91.2266	19.5643		9	0
40764.8	89602.9	91.4302	20.6581	mini-sprout	9	0	0.428571
41693.5	89591.8	68.8684	12.2013		10	0
41676.4	89632	68.1155	17.0585		10	0
41718.9	89620.2	66.9647	12.0376		10	0
41673.5	89680.9	72.9983	10.7555		10	0
41713.8	89690	64.9278	13.0021		10	0
41721.8	89655.4	71.8297	9.35068		10	0
41676	89652.8	77.3638	20.4162	mini-sprout	10	0	0
38221.7	89960	-2.95435	26.927		11	0
38172.8	89894	9.66431	26.3978		11	0
38233.9	89931.1	5.3537	24.9379		11	0
38213.3	89898.6	9.1576	25.0459		11	0
38190.8	89940.1	1.61275	25.8813		11	0
38165.9	89933.9	5.37965	21.6534		11	0
38218.5	89980.6	23.9194	9.83033	mini-sprout_1	11	0	0
38267.8	89985.2	-6.12505	17.4178		12	0
38256.6	89916.7	9.69726	27.4072		12	0
38262.5	89958.9	4.67961	24.9784		12	0
38325	89941.2	6.76305	29.4249		12	0
38274.2	89911.2	8.66114	34.3637		12	1
38303.7	89916.5	27.9038	31.6711		12	1
38300	89917.5	19.588	83.8516	sprout	12	1	0.428571
38068	89959.6	-14.4131	29.2163		13	0
38030.3	89904.3	1.49965	37.2109		13	1
38069.8	89917.1	-2.61238	46.6697		13	1
38018.7	89945.8	-9.64903	34.9137		13	1
38077.7	89928.4	-7.08777	40.8886		13	1
38011.5	89931.7	6.86885	49.3353	sprout	13	1	0.833333
37981.3	89892.4	5.11928	38.587		14	1
37918.7	89952.8	-10.7407	32.4379		14	1
37920.7	89923.3	-2.08463	42.0769		14	1
37961.1	89934.2	-6.18362	39.6786		14	1
37995.2	89952.4	-10.5581	34.9213		14	1
37989.9	89871.5	9.75088	38.6932		14	1
37958.7	89897.1	6.94186	52.6437	sprout	14	1	1
38013.1	89789.7	10.7575	41.8309		15	1
38065.4	89791.7	15.0626	43.7907		15	1
38046.6	89801.1	13.1813	39.397		15	1
38022.6	89850.7	11.6663	39.3807		15	1
38076.6	89841	13.8347	39.6829		15	1
38063.2	89895.5	3.91545	38.508		15	1
38064.1	89805.9	15.6055	66.9573	sprout	15	1	1
37923.1	89788.9	9.59998	36.7759		16	1
37909.7	89817.1	14.9818	39.8648		16	1
37961.4	89805	15.5028	39.0676		16	1
37927.2	89869.6	15.0728	40.5683		16	1
37910.9	89854	15.1269	39.7706		16	1
37935	89839.8	14.7326	34.4805		16	1
37981.2	89819.1	32.8453	47.0156	sprout	16	1	1
38593.8	89880.8	14.6097	32.0773		17	1
38594.6	89934	7.40404	32.3442		17	1
38610.6	89957.2	3.75723	29.3054		17	0
38631.6	89959	4.91948	31.2759		17	1
38632.7	89896.2	18.2188	31.7694		17	1
38673.1	89933.3	18.1283	33.9274		17	1
38646.9	89928.9	23.3563	46.3104	sprout	17	1	0.857143
38698.1	89794.7	8.75778	29.3963		18	0
38724.6	89800.9	9.6428	30.1965		18	1
38725.7	89828	14.9942	29.8294		18	0
38697.5	89885.2	19.8565	30.8364		18	1
38670.8	89852.3	19.9755	29.3786		18	0
38743.4	89905.2	14.8372	27.7369		18	0
38682.2	89860.3	43.195	32.5941	sprout	18	1	0.428571
38896.2	89703.9	-28.2947	25.9267		19	0
38916.8	89715.8	-25.9806	28.6021		19	0
38916.4	89738.5	-19.8299	35.2581		19	1
38910.7	89787.5	3.23069	32.8955		19	1
38911.1	89828.3	11.7202	31.8281		19	1
38948.1	89815.1	15.067	34.4788		19	1
38946.2	89796.8	18.3606	28.1246	mini-sprout	19	0	0.571429
43798.7	77070.2	159.195	57.2902		20	1
43843.2	77060.8	156.776	56.9753		20	1
43776.2	77106.6	166.22	57.722		20	1
43852.6	77097.4	167.486	57.8737		20	1
43787.8	77135	170.905	61.2431		20	1
43827.3	77138.3	173.355	58.4031		20	1
43812.6	77106	182.091	88.8581	sprout	20	1	1
43797	77175.5	158.428	56.3082		21	1
43823.4	77177.7	159.697	56.4203		21	1
43856.5	77199.9	155.347	50.4285		21	1
43889	77210.1	155.171	53.2699		21	1
43906.2	77194.1	158.967	57.2967		21	1
43866.5	77140.4	172.743	60.5407		21	1
43866.9	77169.8	179.855	75.0885	sprout	21	1	1
